# Supplementary material for: Introducing return of results in the Million Veteran Program: Design and pilot results of the MVP-ROAR Familial Hypercholesterolemia Study
Source: bioRxiv or medRxiv preprint supplement (doi:10.1101/2023.10.07.23295899), 2023-10-17
Supplement: Supplementary file [file media-4.pdf]

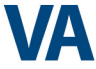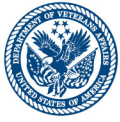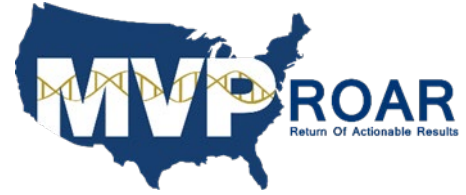

Million Veteran Program  
Washington, DC 20420

**MVP-ROAR BASELINE SURVEY**

**PARTICIPANT ID:** \_\_\_\_\_

The following questions are intended to collect information about you and your health care. You may choose to skip any question that you do not wish to answer.

**1. SELF-RELATED HEALTH AND QUALITY OF LIFE**

This information will help keep track of how you feel and how well you are able to do your usual activities. If you are unsure how to answer a question, please give the best answer you can.

**1. In general, would you say your health is...?**

- Excellent
- Very Good
- Good
- Fair
- Poor

**2. The following questions are about activities you might do during a typical day. Does your health now limit you in these activities? If so, how much?**

**a. Moderate activities, such as moving a table, pushing a vacuum cleaner, bowling, or playing golf?**

- Yes, limited a lot
- Yes, limited a little
- No, not limited at all

**b. Climbing several flights of stairs?**

- Yes, limited a lot
- Yes, limited a little
- No, not limited at all

**3. During the past 4 weeks, have you had any of the following problems with your work or other regular daily activities as a result of your physical health?**

**a. Accomplished less than you would like?**

- No, none of the time
- Yes, a little of the time
- Yes, some of the time
- Yes, most of the time
- Yes, all of the time

**b. Were limited in the kind of work or other activities?**

- No, none of the time
- Yes, a little of the time
- Yes, some of the time
- Yes, most of the time
- Yes, all of the time

**4. During the past 4 weeks, have you had any of the following problems with your work or other regular daily activities as a result of any emotional problems (such as feeling depressed or anxious)?**

**a. Accomplished less than you would like?**

- No, none of the time
- Yes, a little of the time
- Yes, some of the time
- Yes, most of the time
- Yes, all of the time

**b. Didn't do work or other activities as carefully as usual?**

- No, none of the time
- Yes, a little of the time
- Yes, some of the time
- Yes, most of the time
- Yes, all of the time

**5. During the past 4 weeks, how much did pain interfere with your normal work (including both work outside the home and house work)?**

- Not at all       A little bit       Moderately       Quite a bit       Extremely

These questions are about how you feel and how things have been with you during the past 4 weeks. For each question, please give the one answer that comes closest to the way you have been feeling.

**6. How much of the time during the past 4 weeks:**

**a. Have you felt calm and peaceful?**

- All of the time
- Most of the time
- A good bit of the time
- Some of the time
- A little of the time
- None of the time

**b. Did you have a lot of energy?**

- All of the time
- Most of the time
- A good bit of the time
- Some of the time
- A little of the time
- None of the time

**c. Have you felt downhearted and blue?**

- All of the time
- Most of the time
- A good bit of the time
- Some of the time
- A little of the time
- None of the time

**7. During the past 4 weeks, how much of the time has your physical health or emotional problems interfered with your social activities (like visiting with friends, relatives, etc.)?**

- All of the time
- Most of the time
- Some of the time
- A little of the time
- None of the time

Now, we'd like to ask you some questions about how your health may have changed.

**8. Compared to one year ago, how would you rate your physical health in general now?**

- Much better
- Slightly better
- About the same
- Slightly worse
- Much worse

**9. Compared to one year ago, how would you rate your emotional problems (such as feeling anxious, depressed, or irritable) now?**

- Much better
- Slightly better
- About the same
- Slightly worse
- Much worse"

**2. PATIENT ACTIVATION**

The following are statements that people sometimes make when they talk about their health. Please indicate how much you disagree or agree with each statement as it applies to you personally. Your answers should be what is true for you and not just what you think others expect of you. Your choices are *Strongly Disagree*, *Disagree*, *Agree*, or *Strongly Agree*. If the statement does not apply to you, please say *Does Not Apply*.

**1. When all is said and done, I am the person who is responsible for managing my health.**

- Strongly Disagree    Disagree    Agree    Strongly Agree    Does Not Apply

**2. Taking an active role in my own health care is the most important factor in determining my health and ability to function.**

- Strongly Disagree    Disagree    Agree    Strongly Agree    Does Not Apply

**3. I am confident that I can take actions that will help prevent or minimize some symptoms and problems associated with my health.**

- Strongly Disagree    Disagree    Agree    Strongly Agree    Does Not Apply

**4. I know what each of my prescribed medications does.**

Strongly Disagree  Disagree  Agree  Strongly Agree  Does Not Apply

**5. I am confident that I can tell when I need to go get medical care and when I can handle a health problem myself.**

Strongly Disagree  Disagree  Agree  Strongly Agree  Does Not Apply

**6. I am confident I can tell a doctor concerns I have even when he or she does not ask.**

Strongly Disagree  Disagree  Agree  Strongly Agree  Does Not Apply

**7. I am confident that I can follow through on medical treatments I need to do at home.**

Strongly Disagree  Disagree  Agree  Strongly Agree  Does Not Apply

**8. I understand the nature and causes of my health problems.**

Strongly Disagree  Disagree  Agree  Strongly Agree  Does Not Apply

**9. I know the different medical treatment options available for my health condition.**

Strongly Disagree  Disagree  Agree  Strongly Agree  Does Not Apply

**10. I have been able to maintain the lifestyle changes for my health that I have made.**

Strongly Disagree  Disagree  Agree  Strongly Agree  Does Not Apply

**11. I know how to prevent further problems with my health.**

Strongly Disagree  Disagree  Agree  Strongly Agree  Does Not Apply

**12. I am confident I can figure out solutions when new situations or problems arise with my health.**

Strongly Disagree  Disagree  Agree  Strongly Agree  Does Not Apply

**13. I am confident I can maintain lifestyle changes, like diet and exercise, even during times of stress.**

Strongly Disagree  Disagree  Agree  Strongly Agree  Does Not Apply

### 3. BELIEFS ABOUT MEDICINES

The following statements are related to your thoughts about medications in general. For each of the following statements, please indicate whether you *Strongly Disagree*, *Disagree*, *Neither Agree Nor Disagree*, *Agree*, or *Strongly Agree*.

**1. Doctors use too many medicines.**

Strongly Disagree  Disagree  Neither Agree Nor Disagree  Agree  Strongly Agree

**2. People who take medicines should stop their treatment every now and then.**

Strongly Disagree  Disagree  Neither Agree Nor Disagree  Agree  Strongly Agree

**3. If doctors have more time with patients they would prescribe fewer medicines.**

Strongly Disagree  Disagree  Neither Agree Nor Disagree  Agree  Strongly Agree

**4. Doctors place too much trust in medicines.**

Strongly Disagree  Disagree  Neither Agree Nor Disagree  Agree  Strongly Agree

**5. Medicines do more harm than good.**

Strongly Disagree  Disagree  Neither Agree Nor Disagree  Agree  Strongly Agree

**6. Most medicines are addictive.**

Strongly Disagree  Disagree  Neither Agree Nor Disagree  Agree  Strongly Agree

**7. All medicines are poisons.**

Strongly Disagree  Disagree  Neither Agree Nor Disagree  Agree  Strongly Agree

**8. Natural remedies are safer than medicines.**

Strongly Disagree  Disagree  Neither Agree Nor Disagree  Agree  Strongly Agree

#### 4. DEMOGRAPHIC INFORMATION

##### 1. What is your race? *(Please mark all that apply)*

- White
- Black / African-American
- American Indian / Alaska Native
- Chinese
- Japanese
- Asian Indian
- Other Asian
- Filipino
- Pacific Islander
- Other

##### 2. Are you Spanish, Hispanic, or Latino?

- No, not Spanish, Hispanic, or Latino
- Yes, Mexican, Mexican American, Chicano
- Yes, Puerto Rican
- Yes, Cuban
- Yes, other Spanish, Hispanic, Latino
